# Supplementary material for: Multi-Trait Multi-Environment Genomic Prediction of Agronomic Traits in Advanced Breeding Lines of Winter Wheat
Source: PubMed Central journal article supplement (PMC8416538; doi:10.3389/fpls.2021.709545), 2021-08-18

## SUPPLEMENTARY MATERIAL

### **Multi-trait multi-environment genomic prediction of agronomic traits in advanced breeding lines of winter wheat**

Harsimardeep S Gill<sup>1</sup>, Jyotirmoy Halder<sup>1</sup>, Jinfeng Zhang<sup>1</sup>, Navreet K Brar<sup>1</sup>, Teerath S Rai<sup>1</sup>, Cody Hall<sup>1</sup>, Amy Bernardo<sup>2</sup>, Paul St Amand<sup>3</sup>, Guihua Bai<sup>3</sup>, Eric Olson<sup>4</sup>, Shaukat Ali<sup>1</sup>, Brent Turnipseed<sup>1</sup>, Sunish K Sehgal<sup>1\*</sup>

<sup>1</sup>Department of Agronomy, Horticulture & Plant Science, South Dakota State University, Brookings, SD, USA

<sup>2</sup>Department of Plant Pathology, Kansas State University, Manhattan, KS, USA.

<sup>3</sup>USDA-ARS, Hard Winter Wheat Genetic Research Unit, Manhattan, KS, USA

<sup>4</sup>Department of Plant, Soil and Microbial Sciences, Michigan State University, East Lansing, MI, USA

#### **\*Corresponding Author:**

Sunish K. Sehgal,

Department of Agronomy, Horticulture & Plant Science, South Dakota State University, Brookings, SD 57007

Email address: [sunish.sehgal@sdstate.edu](mailto:sunish.sehgal@sdstate.edu)

The genomic datasets used in this study can be found online repositories at <https://github.com/SunishSehgal/>.

Supplementary Table S1. Information of the experimental sites used in the growing seasons of 2018-19 and 2019-20.

| Site              | Coordinates                | 2018-19   |           | 2019-20   |           |
|-------------------|----------------------------|-----------|-----------|-----------|-----------|
|                   |                            | Date      | Date      | Date      | Date      |
|                   |                            | seeded    | harvested | seeded    | harvested |
| Brookings (BRK)   | 44°18'35.3"N 96°40'14.5"W  | 9/16/2018 | 8/6/2019  | 9/20/2019 | 7/20/2020 |
| Dakota Lakes (DL) | 44°17'34.2"N 99°59'40.6"W  | 9/28/2018 | 7/23/2019 | 9/19/2019 | 7/17/2020 |
| Hayes (HYS)       | 44°22'24.8"N 101°02'45.1"W | 9/14/2018 | 7/31/2019 | 9/17/2019 | 7/21/2020 |
| Onida (OND)       | 44°42'57.5"N 100°23'04.2"W | 9/25/2018 | 8/1/2019  | 9/18/2019 | 7/28/2020 |
| Winner (WIN)      | 43°29'57.0"N 99°51'58.4"W  | 10/2/2018 | 7/25/2019 | 9/27/2019 | 7/15/2020 |

Supplementary Table S2. Genetic correlation between five agronomic traits evaluated in 2018-19 estimated using the BMTME model. Evaluated traits include grain yield (YLD); grain protein content (PROT); test weight (TW); plant height (HT); and days to heading (HD).

| <b>Trait</b> | <b>YLD</b> | <b>PROT</b> | <b>TW</b> | <b>HT</b> | <b>HD</b> |
|--------------|------------|-------------|-----------|-----------|-----------|
| YLD          | 1          | -0.15       | 0.29      | 0.00      | -0.13     |
| PROT         | -0.15      | 1           | 0.35      | -0.01     | 0.09      |
| TW           | 0.29       | 0.35        | 1         | -0.02     | 0.07      |
| HT           | 0.00       | -0.01       | -0.02     | 1         | -0.01     |
| HD           | -0.13      | 0.09        | 0.07      | -0.01     | 1         |

Supplementary Table S3. Genetic correlation between five agronomic traits evaluated in 2019-20 estimated using the BMTME model. Evaluated traits include grain yield (YLD); grain protein content (PROT); test weight (TW); plant height (HT); and days to heading (HD).

| <b>Trait</b> | <b>YLD</b> | <b>PROT</b> | <b>TW</b> | <b>HT</b> | <b>HD</b> |
|--------------|------------|-------------|-----------|-----------|-----------|
| YLD          | 1          | -0.44       | -0.14     | -0.43     | -0.18     |
| PROT         | -0.44      | 1           | 0.25      | 0.38      | -0.14     |
| TW           | -0.14      | 0.25        | 1         | 0.39      | -0.09     |
| HT           | -0.43      | 0.38        | 0.39      | 1         | 0.18      |
| HD           | -0.18      | -0.14       | -0.09     | 0.18      | 1         |

Supplementary Table S4. Prediction accuracy for five traits recorded at five different environments in 2018-19 using different genomic prediction models (ST-CV1, single-trait model; MT-CV1, multi-trait model with CV1 scheme; MT-CV2, multi-trait model with CV2 scheme; MTME, multi-trait multi-environment model with CV1 scheme). The value in bold indicates the best performing model for given trait at respective location.

| Trait           | Env          | ST-CV1      |       | MT-CV1      |      | MT-CV2      |      | MTME        |      |
|-----------------|--------------|-------------|-------|-------------|------|-------------|------|-------------|------|
|                 |              | Mean PA     | S.E.  | Mean PA     | S.E. | Mean PA     | S.E. | Mean PA     | S.E. |
| Yield           | Brookings    | 0.28        | 0.005 | 0.29        | 0.02 | <b>0.56</b> | 0.02 | 0.26        | 0.03 |
|                 | Dakota Lakes | 0.32        | 0.004 | 0.28        | 0.03 | <b>0.40</b> | 0.02 | 0.36        | 0.02 |
|                 | Hayes        | 0.38        | 0.004 | 0.35        | 0.02 | <b>0.41</b> | 0.02 | 0.25        | 0.03 |
|                 | Onida        | <b>0.43</b> | 0.004 | 0.42        | 0.01 | <b>0.43</b> | 0.02 | 0.35        | 0.03 |
|                 | Winner       | 0.13        | 0.005 | 0.03        | 0.02 | 0.15        | 0.03 | <b>0.18</b> | 0.03 |
|                 | Average      | 0.31        | -     | 0.27        | -    | <b>0.39</b> | -    | 0.28        | -    |
| Protein content | Brookings    | 0.40        | 0.004 | 0.41        | 0.02 | <b>0.45</b> | 0.02 | 0.33        | 0.03 |
|                 | Dakota Lakes | 0.50        | 0.004 | <b>0.56</b> | 0.02 | 0.51        | 0.02 | 0.45        | 0.03 |
|                 | Hayes        | 0.32        | 0.004 | 0.34        | 0.02 | <b>0.38</b> | 0.02 | 0.26        | 0.03 |
|                 | Onida        | 0.39        | 0.004 | 0.41        | 0.01 | 0.39        | 0.02 | <b>0.46</b> | 0.03 |
|                 | Winner       | 0.15        | 0.004 | 0.20        | 0.02 | <b>0.29</b> | 0.02 | 0.13        | 0.04 |
|                 | Average      | 0.35        | -     | 0.38        | -    | 0.40        | -    | 0.32        | -    |
| Test weight     | Brookings    | 0.31        | 0.004 | 0.31        | 0.02 | <b>0.48</b> | 0.02 | 0.35        | 0.03 |
|                 | Dakota Lakes | 0.23        | 0.005 | 0.23        | 0.01 | <b>0.39</b> | 0.02 | 0.32        | 0.02 |
|                 | Hayes        | 0.50        | 0.004 | 0.49        | 0.02 | <b>0.54</b> | 0.02 | 0.52        | 0.02 |
|                 | Onida        | 0.43        | 0.005 | 0.41        | 0.02 | 0.40        | 0.02 | <b>0.47</b> | 0.03 |
|                 | Winner       | 0.35        | 0.005 | 0.36        | 0.02 | 0.32        | 0.02 | <b>0.43</b> | 0.02 |
|                 | Average      | 0.36        | -     | 0.36        | -    | 0.42        | -    | 0.42        | -    |
| Plant height    | Brookings    | 0.26        | 0.005 | 0.24        | 0.02 | 0.38        | 0.02 | <b>0.44</b> | 0.03 |
|                 | Dakota Lakes | 0.16        | 0.005 | 0.16        | 0.02 | 0.38        | 0.02 | <b>0.41</b> | 0.04 |
|                 | Hayes        | 0.33        | 0.004 | 0.21        | 0.02 | 0.31        | 0.02 | <b>0.42</b> | 0.03 |
|                 | Onida        | 0.16        | 0.004 | 0.16        | 0.02 | 0.27        | 0.02 | <b>0.45</b> | 0.03 |
|                 | Winner       | 0.32        | 0.004 | 0.30        | 0.02 | 0.34        | 0.02 | <b>0.54</b> | 0.03 |
|                 | Average      | 0.25        | -     | 0.21        | -    | 0.34        | -    | 0.42        | -    |
| Heading date    | Brookings    | 0.46        | 0.004 | 0.46        | 0.03 | 0.44        | 0.03 | <b>0.49</b> | 0.02 |
|                 | Dakota Lakes | 0.33        | 0.005 | 0.32        | 0.02 | <b>0.47</b> | 0.02 | 0.40        | 0.04 |
|                 | Hayes        | 0.23        | 0.005 | 0.24        | 0.02 | <b>0.25</b> | 0.02 | 0.16        | 0.04 |
|                 | Onida        | 0.35        | 0.005 | 0.39        | 0.02 | <b>0.40</b> | 0.01 | 0.37        | 0.03 |
|                 | Winner       | 0.35        | 0.005 | 0.35        | 0.02 | <b>0.37</b> | 0.02 | 0.37        | 0.03 |
|                 | Average      | 0.34        | -     | 0.35        | -    | 0.38        | -    | 0.36        | -    |

Supplementary Table S5. Prediction accuracy for five traits recorded at five different environments in 2019-20 using different genomic prediction models (ST-CV1, single-trait model; MT-CV1, multi-trait model with CV1 scheme; MT-CV2, multi-trait model with CV2 scheme; MTME, multi-trait multi-environment model with CV1 scheme). The value in bold indicates the best performing model for given trait at respective location.

| Trait           | Env          | ST-CV1  |       | MT-CV1  |      | MT-CV2      |      | MTME        |      |
|-----------------|--------------|---------|-------|---------|------|-------------|------|-------------|------|
|                 |              | Mean PA | S.E.  | Mean PA | S.E. | Mean PA     | S.E. | Mean PA     | S.E. |
| Yield           | Brookings    | 0.29    | 0.006 | 0.27    | 0.03 | <b>0.52</b> | 0.02 | 0.39        | 0.03 |
|                 | Dakota Lakes | 0.33    | 0.005 | 0.33    | 0.02 | <b>0.57</b> | 0.02 | 0.46        | 0.03 |
|                 | Hayes        | 0.50    | 0.004 | 0.52    | 0.02 | <b>0.71</b> | 0.01 | 0.44        | 0.02 |
|                 | Onida        | 0.44    | 0.003 | 0.41    | 0.02 | <b>0.50</b> | 0.02 | 0.46        | 0.03 |
|                 | Winner       | 0.27    | 0.005 | 0.23    | 0.02 | <b>0.67</b> | 0.01 | 0.43        | 0.02 |
|                 | Average      | 0.36    | -     | 0.35    | -    | <b>0.59</b> | -    | 0.43        | -    |
| Protein content | Brookings    | 0.41    | 0.005 | 0.41    | 0.02 | 0.58        | 0.02 | <b>0.62</b> | 0.02 |
|                 | Dakota Lakes | 0.34    | 0.004 | 0.36    | 0.02 | 0.59        | 0.01 | <b>0.67</b> | 0.02 |
|                 | Hayes        | 0.40    | 0.004 | 0.40    | 0.02 | 0.56        | 0.02 | <b>0.59</b> | 0.02 |
|                 | Onida        | 0.26    | 0.005 | 0.22    | 0.02 | 0.31        | 0.02 | <b>0.52</b> | 0.03 |
|                 | Winner       | 0.34    | 0.004 | 0.35    | 0.02 | <b>0.66</b> | 0.01 | 0.58        | 0.02 |
|                 | Average      | 0.35    | -     | 0.35    | -    | 0.54        | -    | 0.60        | -    |
| Test weight     | Brookings    | 0.56    | 0.003 | 0.57    | 0.01 | 0.59        | 0.01 | <b>0.64</b> | 0.02 |
|                 | Dakota Lakes | 0.58    | 0.004 | 0.58    | 0.02 | 0.61        | 0.01 | <b>0.63</b> | 0.02 |
|                 | Hayes        | 0.58    | 0.004 | 0.57    | 0.02 | 0.64        | 0.01 | <b>0.67</b> | 0.02 |
|                 | Onida        | 0.60    | 0.003 | 0.60    | 0.02 | 0.59        | 0.02 | <b>0.66</b> | 0.02 |
|                 | Winner       | 0.37    | 0.005 | 0.33    | 0.02 | 0.50        | 0.02 | <b>0.53</b> | 0.02 |
|                 | Average      | 0.54    | -     | 0.53    | -    | 0.59        | -    | 0.63        | -    |
| Plant height    | Brookings    | 0.35    | 0.004 | 0.35    | 0.02 | 0.40        | 0.02 | <b>0.51</b> | 0.02 |
|                 | Dakota Lakes | 0.31    | 0.005 | 0.26    | 0.02 | 0.43        | 0.02 | <b>0.44</b> | 0.02 |
|                 | Hayes        | 0.43    | 0.004 | 0.41    | 0.02 | 0.53        | 0.02 | <b>0.59</b> | 0.02 |
|                 | Onida        | 0.28    | 0.005 | 0.24    | 0.03 | 0.43        | 0.02 | <b>0.48</b> | 0.02 |
|                 | Winner       | 0.28    | 0.005 | 0.27    | 0.02 | 0.36        | 0.02 | <b>0.41</b> | 0.03 |
|                 | Average      | 0.33    | -     | 0.31    | -    | 0.43        | -    | 0.49        | -    |
| Heading date    | Brookings    | 0.37    | 0.004 | 0.41    | 0.02 | 0.42        | 0.02 | <b>0.58</b> | 0.02 |
|                 | Dakota Lakes | 0.29    | 0.004 | 0.27    | 0.02 | 0.30        | 0.02 | <b>0.54</b> | 0.02 |
|                 | Hayes        | 0.29    | 0.005 | 0.36    | 0.02 | 0.32        | 0.03 | <b>0.48</b> | 0.04 |
|                 | Onida        | 0.44    | 0.004 | 0.46    | 0.02 | 0.45        | 0.02 | <b>0.56</b> | 0.02 |
|                 | Winner       | 0.35    | 0.004 | 0.31    | 0.02 | 0.39        | 0.02 | <b>0.48</b> | 0.02 |
|                 | Average      | 0.35    | -     | 0.36    | -    | 0.38        | -    | 0.53        | -    |

Supplementary Figure S1. Illustration of different cross-validation schemes used to evaluate different genomic prediction models.

|         | Training set |      |      |      |      |      |      |      | Testing set |      |        |
|---------|--------------|------|------|------|------|------|------|------|-------------|------|--------|
| Trait 1 | YLD          | YLD  | YLD  | YLD  | YLD  | YLD  | YLD  | YLD  | PRED        | PRED | ST-CV1 |
| Trait 2 |              |      |      |      |      |      |      |      |             |      |        |
| Trait 3 |              |      |      |      |      |      |      |      |             |      |        |
| Trait 4 |              |      |      |      |      |      |      |      |             |      |        |
| Trait 5 |              |      |      |      |      |      |      |      |             |      |        |
| Trait 1 | YLD          | YLD  | YLD  | YLD  | YLD  | YLD  | YLD  | YLD  | PRED        | PRED | MT-CV1 |
| Trait 2 | PROT         | PROT | PROT | PROT | PROT | PROT | PROT | PROT |             |      |        |
| Trait 3 | TW           | TW   | TW   | TW   | TW   | TW   | TW   | TW   |             |      |        |
| Trait 4 | HT           | HT   | HT   | HT   | HT   | HT   | HT   | HT   |             |      |        |
| Trait 5 | HD           | HD   | HD   | HD   | HD   | HD   | HD   | HD   |             |      |        |
| Trait 1 | YLD          | YLD  | YLD  | YLD  | YLD  | YLD  | YLD  | YLD  | PRED        | PRED | MT-CV2 |
| Trait 2 | PROT         | PROT | PROT | PROT | PROT | PROT | PROT | PROT | PROT        | PROT |        |
| Trait 3 | TW           | TW   | TW   | TW   | TW   | TW   | TW   | TW   | TW          | TW   |        |
| Trait 4 | HT           | HT   | HT   | HT   | HT   | HT   | HT   | HT   | HT          | HT   |        |
| Trait 5 | HD           | HD   | HD   | HD   | HD   | HD   | HD   | HD   | HD          | HD   |        |

Supplementary Figure S2. Correlation coefficients among five agronomic traits recorded at five locations in 2018-19. Evaluated traits include YLD, grain yield; PROT, grain protein content; TW, test weight; HT, plant height; and HD, days to heading.

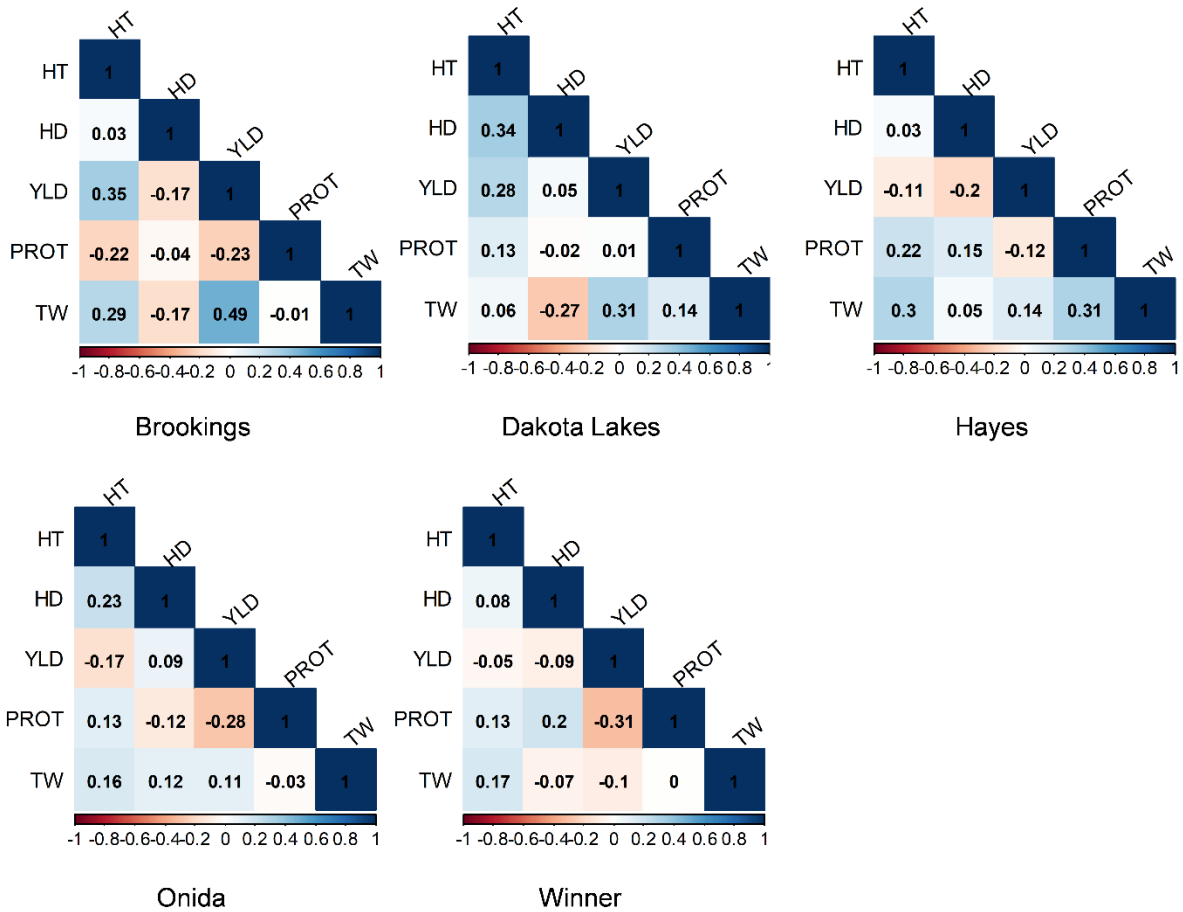



Supplementary Figure S3. Correlation coefficients for five agronomic traits evaluated at five locations in 2019-20. Evaluated traits include grain yield (YLD); grain protein content (PROT); test weight (TW); plant height (HT); and days to heading (HD).

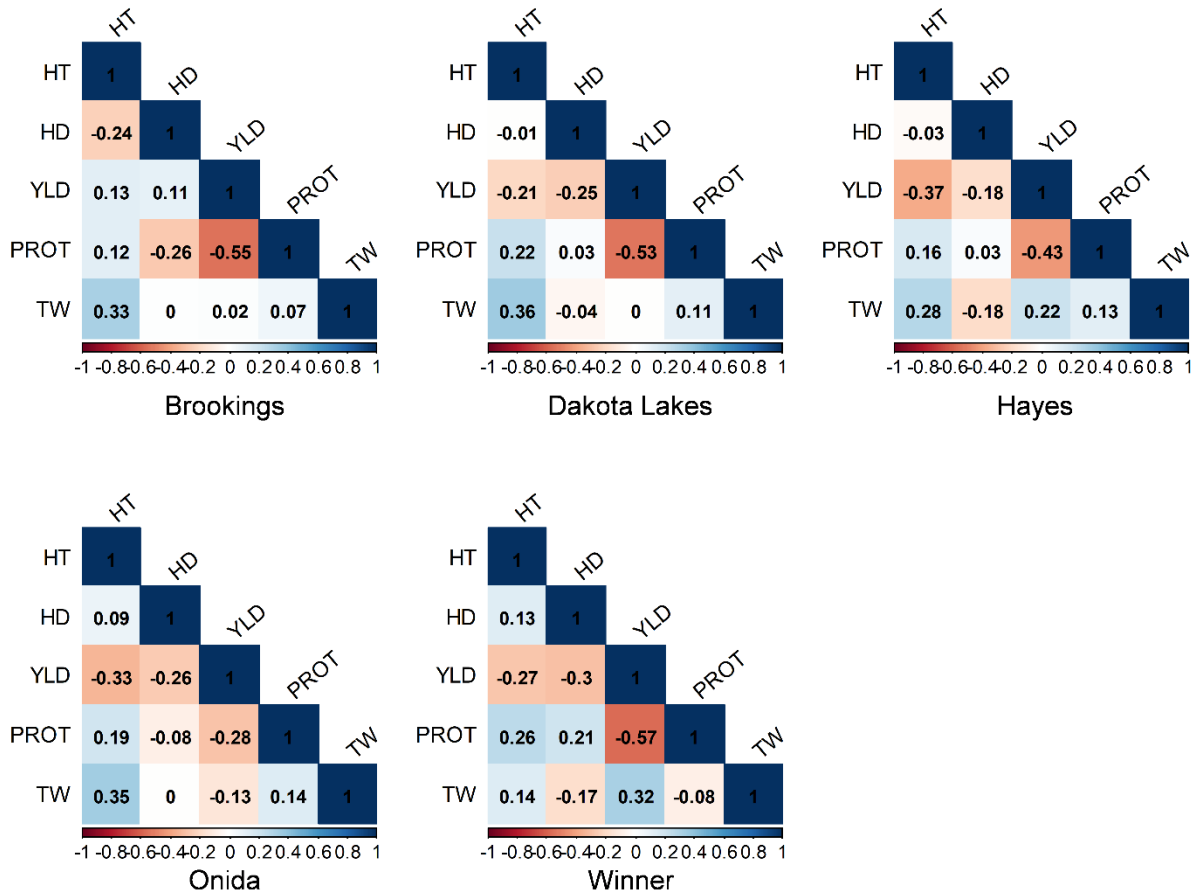

Supplementary Figure S4. Correlation coefficients among five environments (Brookings, BRK; Dakota Lakes, DL; Hayes, HYS; Onida, OND; and Winner, WIN) for five traits evaluated in (A) 2018-19 and (B) 2019-20.

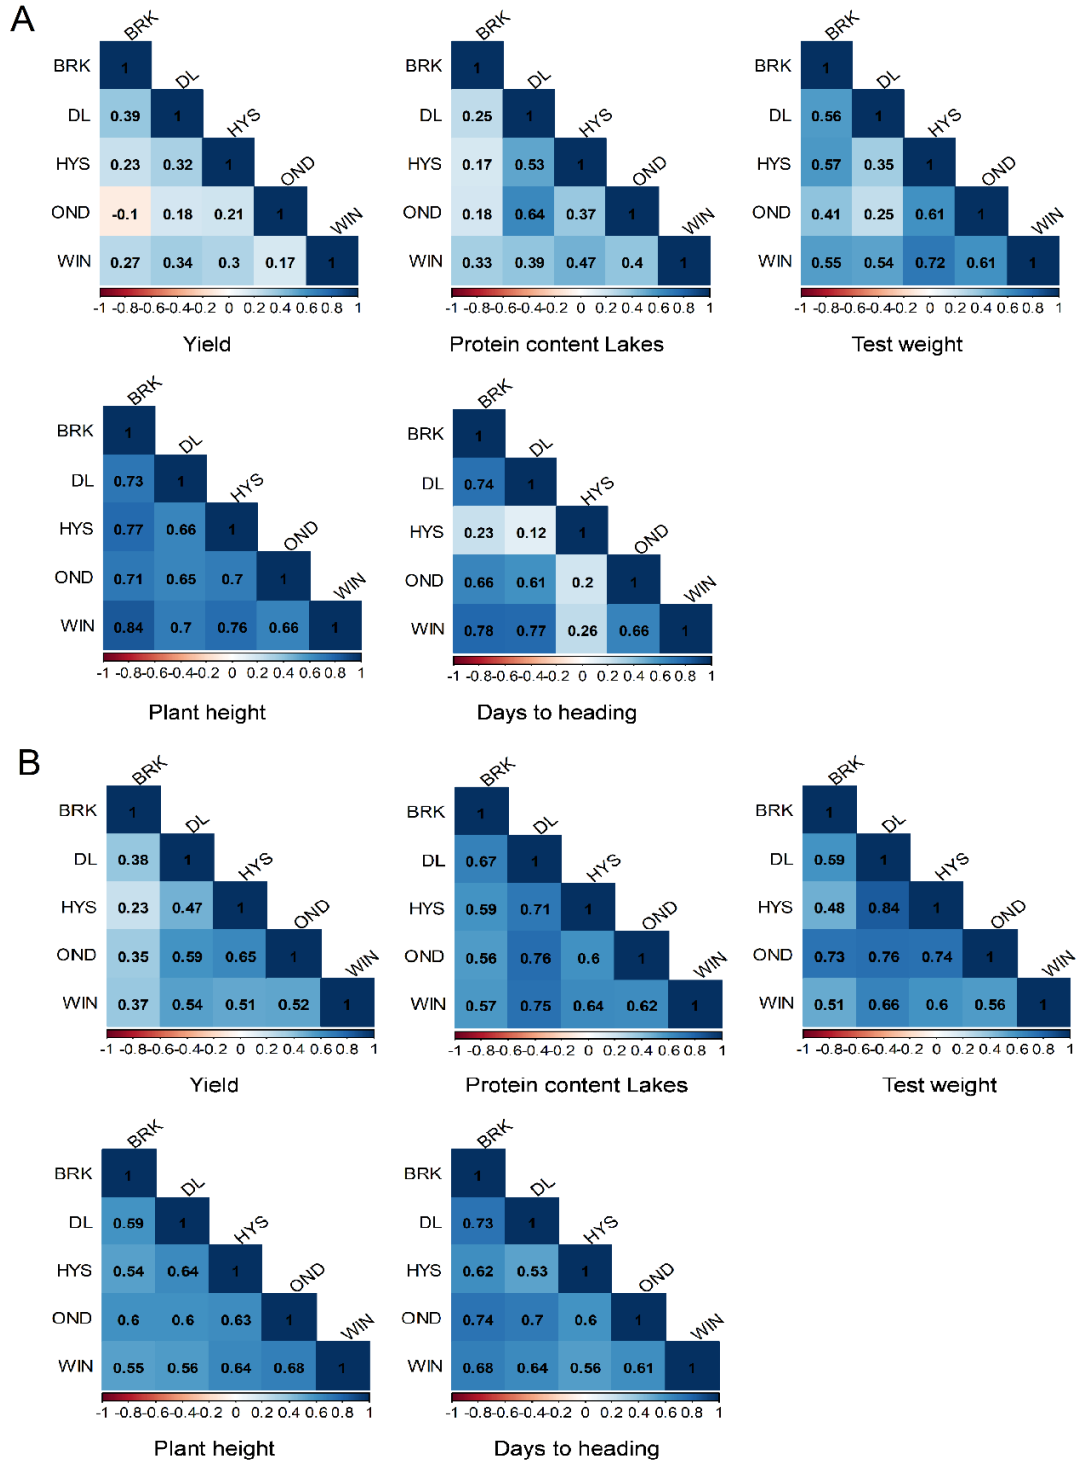

Supplementary Figure S5. Heatmap of the kinship matrix using 10,294 SNPs (**A**) for 151 lines evaluated in the growing season of 2018-19, and (**B**) for 156 lines evaluated in the growing season of 2019-20.

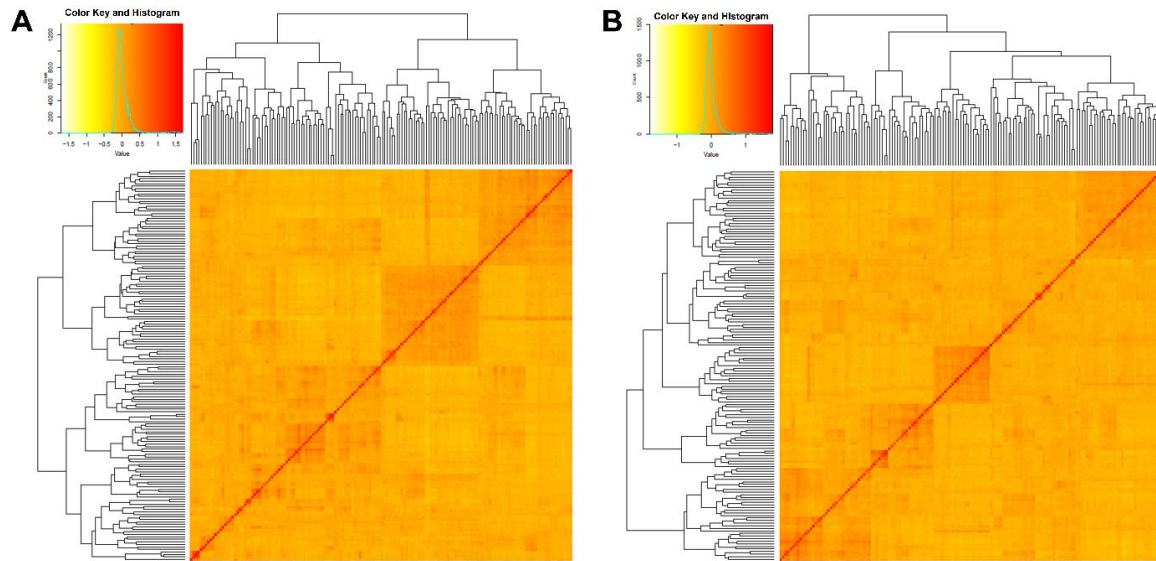

Supplement: Data_Sheet_1.pdf [file Data_Sheet_1.pdf]
